# Supplementary material for: Lentiviral-Mediated Silencing of Farnesyl Pyrophosphate Synthase through RNA Interference in Mice
Source: Hindawi journal article supplement (doi:10.1155/2015/914026), 2015-01-01
Supplement: f1 [file 914026.f1.pdf]

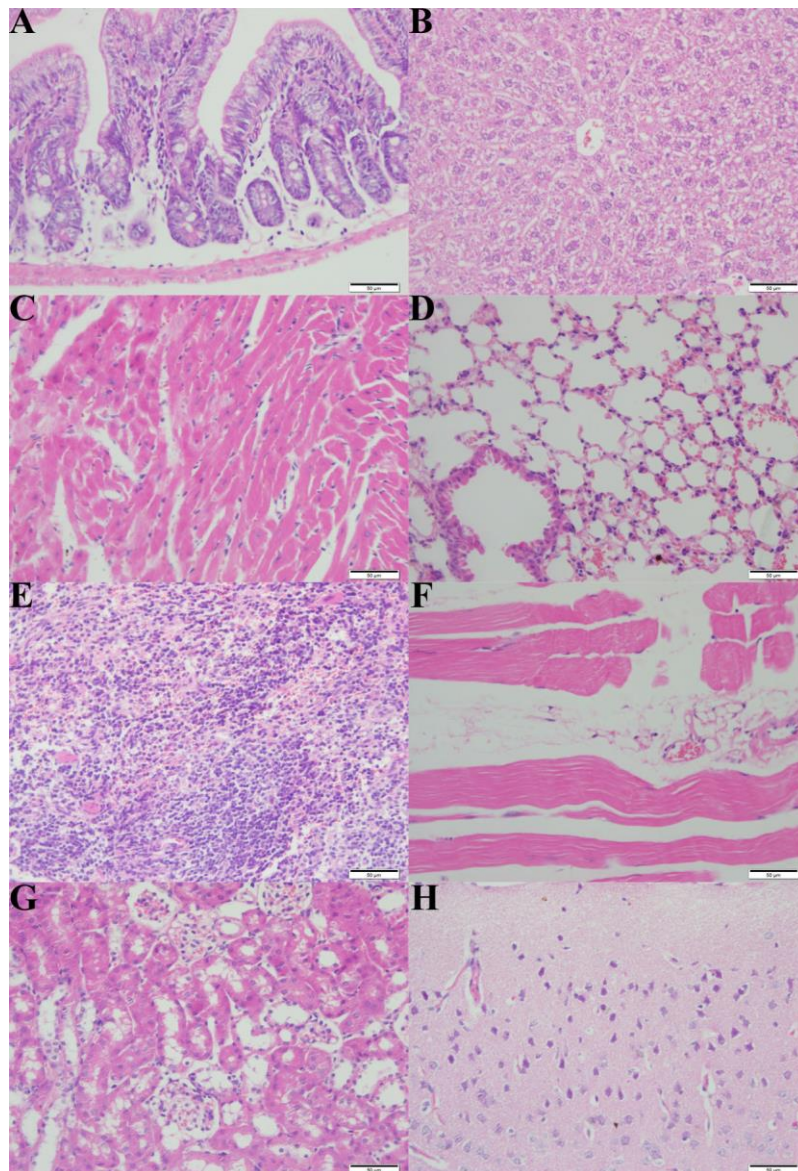

Supplementary figure 1 Morphology of tissues of transgenic RNAi mouse. A: intestine, B: liver, C: heart, D: lung, E: spleen, F: muscle, G: kidney, H: brain

Scale bar, 50  $\mu\text{m}$  for 40 $\times$ .
